# Supplementary material for: All-Trans Retinoic Acid Attenuates Transmissible Gastroenteritis Virus-Induced Apoptosis in IPEC-J2 Cells via Inhibiting ROS-Mediated P38MAPK Signaling Pathway
Source: MDPI journal article supplement (doi:10.3390/antiox11020345), 2022-02-10
Supplement: s1 [file s1]

**Supplemental Table S1.** Primer sequences used for real-time PCR.

| Gene             | Primer Sequence (5' –3')                               | Product Length(bp) | GeneBank Accession No. |
|------------------|--------------------------------------------------------|--------------------|------------------------|
| <i>ZO-1</i>      | F: CGTGTC AACGCCACTATCA<br>R: TTGTCTTCCAAAGCCCCT       | 105                | XM_021098896.1         |
| <i>Occludin</i>  | F: AACTTCCACTGATGTCCCCCGT<br>R: CCTAGACTTTCCTGCTCTGCCC | 116                | NM_001163647.2         |
| <i>Claudin-2</i> | F: GCATCATTTTCCTCCCTGTT<br>R: TCTTGGCTTTGGGTGGTT       | 156                | NM_001161638.1         |
| <i>Mucin-1</i>   | F: GTGCCGCTGCCCAACCTG<br>R: AGCCGGGTACCCCAAGACCCA      | 141                | XM_021089730.1         |
| <i>Mucin-2</i>   | F: GGTCATGCTGGAGCTGGACAGT<br>R: TGCCTCCTCGGGGTCGTCAC   | 181                | XM_021082584.1         |
| <i>Fas</i>       | F: TGATGCCCAAGTGACTGACC<br>R: GCAGAATTGACCCTCACGAT     | 103                | NM_213839              |
| <i>Bax</i>       | F: GACGCTGGACTTCCTTCGAG<br>R: GTGGCCCGAGAGAGGTTTATT    | 334                | XM_013998624.2         |
| <i>Bcl-2</i>     | F: GCTACTTACTGCCAAAGGGA<br>R: TTCAGGCGGAGCTGTAAGAG     | 161                | XM_021099593.1         |
| <i>Caspase-3</i> | F: GGAATGGCATGTCGATCTGGT<br>R: ACTGTCCGTCTCAATCCAC     | 351                | NM_214131.1            |
| <i>Caspase-8</i> | F: TCTGCGGACTGGATGTGATT<br>R: TCTGAGGTTGCTGGTCACAC     | 165                | XM_021074714.1         |
| <i>Caspase-9</i> | F: AATGCCGATTTGGCTTACGT<br>R: CATTGCTTGGCAGTCAGGTT     | 195                | XM_013998997.2         |
| <i>GPX1</i>      | F: GTGAATGGCGCAAATGCTCA<br>R: ATTGCGACACACTGGAGACC     | 126                | NM_214201.1            |
| <i>GPX2</i>      | F: AGAATGTGGCCTCGCTCTGA<br>R: GGCATTGCAGCTCGTTGAG      | 112                | DQ898282               |
| <i>SOD1</i>      | F: AGACCTGGGCAATGTGACTG<br>R: GTGCGGCCAATGATGGAATG     | 102                | NM_001190422.1         |
| <i>CAT</i>       | F: CGAAGGCGAAGGTGTTTG<br>R: AGTGTGCGATCCATATCC         | 132                | NM_214301.2            |
| <i>GCLC</i>      | F: TCCTCCTCCAAACTCCGACA<br>R: GCACCACAAACACCACGTAC     | 101                | XM_021098556.1         |
| <i>GCLM</i>      | F: GTGATGCCGCCCCGATTAAAC<br>R: TCATGTGCCTCGATGTCAGG    | 140                | XM_001926378.4         |
| $\beta$ -actin   | F: GGATGACGATATTGCTGCGC<br>R: GATGCCTCTCTTGCTCTGGG     | 190                | XM_003124280.5         |

*ZO-1*, zonula occludens 1; *Bax*, B-cell lymphoma-2-associated X protein; *Bcl-2*, B-cell lymphoma-2; *GPX*, glutathione peroxidase; *SOD1*, superoxide dismutase 1; *CAT*, catalase; *GCLC*, catalytic subunit of glutamate-cysteine ligase; *GCLM*, modifier subunit of glutamate-cysteine ligase
